# Supplementary material for: The role of the perceived environment for recreational walking among adults in socioeconomically disadvantaged situations: A study using walk-along interviews
Source: PubMed Central journal article supplement — SSM Popul Health. 2023 Jul 8;23:101456. doi: 10.1016/j.ssmph.2023.101456 (PMC10368917; doi:10.1016/j.ssmph.2023.101456), 2023-07-08
Supplement: mmc1.pdf [file mmc1.pdf]

# Supplementary File 1: Coding Tree

| PHYSICAL ENVIRONMENT                                |                                                                                                                                                                       | SOCIOCULTURAL ENVIRONMENT                                                            |                                                                                                                                                                                       | POLITICAL ENVIRONMENT                     |                                                                                                                                                     |
|-----------------------------------------------------|-----------------------------------------------------------------------------------------------------------------------------------------------------------------------|--------------------------------------------------------------------------------------|---------------------------------------------------------------------------------------------------------------------------------------------------------------------------------------|-------------------------------------------|-----------------------------------------------------------------------------------------------------------------------------------------------------|
| <b>Functional PA environment</b>                    |                                                                                                                                                                       | <b>Social safety</b>                                                                 |                                                                                                                                                                                       | <b>Public recreation regulations</b>      | Regulations regarding recreational places and facilities by public agencies for use by the public                                                   |
| <b>Walking surface</b>                              | The state and width of pavements                                                                                                                                      | <b>Crime and drugs</b>                                                               | Perceptions regarding crime and drug sales and use within the municipality that affect RW                                                                                             | <b>Public transport regulations</b>       | Regulations regarding public transport                                                                                                              |
| <b>Traffic</b>                                      | The presence of parked or driving cars in the streets, speed, noise, signaling and control mechanisms                                                                 | <b>Stray dogs</b>                                                                    | Perceptions regarding the presence and impact of stray dogs that affect RW                                                                                                            | <b>Reality gap</b>                        | Discrepancies in perceptions towards the 'world' between citizens and the local government                                                          |
| <b>Permeability</b>                                 | Permeability relates to intersections (e.g., pedestrian crossings, traffic lights), but also shortcuts, proximity, and accessibility                                  | <b>Gangs</b>                                                                         | Perceptions towards organized group of people (perceived as criminals) that affect RW                                                                                                 | <b>Political engagement</b>               | Ways that citizens can develop and express opinions on how the municipality is governed and take part in and shape decisions that impact their life |
| <b>Aesthetic physical environment</b>               |                                                                                                                                                                       | <b>Discrimination</b>                                                                | Perceptions regarding the treatment of a person or a particular group of people differently, in a way that is worse than the way people are usually treated                           | <b>Rigid and complex structures</b>       | The rigid and complex governmental structures (e.g., flexibility, opening hours, responsiveness, ...)                                               |
| <b>Green spaces</b>                                 | All green aspects in the environment, such as trees, bush, and grass, and natural elements such as flowers, ponds, or rivers                                          | <b>Racism</b>                                                                        | Perceptions regarding discrimination based on race, color, descent, national or ethnic origin) that affect RW                                                                         | <b>Availability of walking activities</b> | The availability of recreational walking activities within the municipality                                                                         |
| <b>Public spaces</b>                                | Places that are open and accessible to the public, such as squares, parks, and playgrounds                                                                            | <b>Stigmatization</b>                                                                | Perceptions regarding unfairly treatment because of public disapproval of certain characteristics                                                                                     | <b>ECONOMIC ENVIRONMENT</b>               |                                                                                                                                                     |
| <b>Maintenance</b>                                  | The process of keeping something in a good condition                                                                                                                  | <b>Driving behavior</b>                                                              | Perceptions regarding driving behaviors regarding safety of people                                                                                                                    | <b>Affordability</b>                      | All factors related to financial affordability of RW                                                                                                |
| <b>Cleanliness</b>                                  | The state or quality of being clean (e.g., the presence of trash, dog poo, face masks, cigarettes on the ground) or being kept clean (e.g., the presence of dustbins) | <b>Gender aspects</b>                                                                | Perceptions regarding gender-related aspects regarding safety                                                                                                                         | <b>Availability low-cost activities</b>   | The availability of low-cost or free activities related to RW                                                                                       |
| <b>Views</b>                                        | The view offered by a landscape, including variation and architectural features                                                                                       | <b>Social involvement</b>                                                            |                                                                                                                                                                                       | <b>Lack of resources</b>                  | Lack of resources within the municipality context (money, materials, staff, and other assets)                                                       |
| <b>Animals</b>                                      | The presence of animals in the street view as an aesthetic element                                                                                                    | <b>Satisfaction and interaction</b>                                                  | The contentment with social interactions within the community                                                                                                                         | <b>Public recreation investments</b>      | Investments that go to public recreation                                                                                                            |
| <b>Facilities</b>                                   |                                                                                                                                                                       | <b>Sense of place &amp; feeling of belonging</b>                                     | The meaning people give to their experiences in and with place, this can also refer to a feeling of belonging which is a perception of inclusion or acceptance into a group of people | <b>Transport investments</b>              | Investments that go to public transport                                                                                                             |
| <b>Toilet</b>                                       | The presence and accessibility of toilets                                                                                                                             | <b>Social engagement</b>                                                             | Degree of participation in the community                                                                                                                                              | <b>Incentives</b>                         | Something that motivates or encourages someone to do something (can be economic, but also social or moral)                                          |
| <b>Parking</b>                                      | The presence and accessibility of parking spots                                                                                                                       | <b>Social support</b>                                                                |                                                                                                                                                                                       | <b>INFORMATION ENVIRONMENT</b>            |                                                                                                                                                     |
| <b>Seating options</b>                              | The presence and accessibility of seating options                                                                                                                     | <b>Social relationships</b>                                                          | Connections that exist between people who have recurring interactions that are perceived to have personal meaning (e.g., family members, friends, neighbors, colleagues)              | <b>Dissemination of information</b>       | Barriers or facilitators in the ways of dissemination of information (e.g., internet, journal, reception, ...)                                      |
| <b>Leash-off zones for dogs</b>                     | An area where dogs are allowed to run freely                                                                                                                          | <b>Social isolation</b>                                                              | A lack of social connections                                                                                                                                                          | <b>Retrieving of information</b>          | Barriers or facilitators to retrieve and access information                                                                                         |
| <b>Activities</b>                                   | Verschil met 'Walking activities'?                                                                                                                                    | <b>Dog-ownership</b>                                                                 | The impact of keeping a dog on RW                                                                                                                                                     | <b>Understanding of information</b>       | Barriers or facilitators in understanding information (e.g., language issues, literacy, ...)                                                        |
| <b>Destinations</b>                                 | Specific spaces where people go for recreational walking (e.g., shops, art, parks)                                                                                    | <b>Work-life integration</b>                                                         |                                                                                                                                                                                       |                                           |                                                                                                                                                     |
| <b>Physical safety</b>                              |                                                                                                                                                                       | Integration of RW in the work-school-household-life context (e.g., time constraints) |                                                                                                                                                                                       |                                           |                                                                                                                                                     |
| <b>Traffic</b>                                      | Physical safety regarding traffic refers to pedestrian crossings, and traffic lights                                                                                  | <b>Cultural standards</b>                                                            |                                                                                                                                                                                       |                                           |                                                                                                                                                     |
| <b>Personal safety</b>                              | Physical safety regarding personal safety refers to street lightning and surveillance                                                                                 | <b>Sociocultural aesthetics</b>                                                      | Aesthetic preferences based on sociocultural characteristics                                                                                                                          |                                           |                                                                                                                                                     |
| <b>Availability of walking activities</b>           |                                                                                                                                                                       | <b>Car culture</b>                                                                   | A shared preference of people to prefer a car over other means of transport                                                                                                           |                                           |                                                                                                                                                     |
| The availability of recreational walking activities |                                                                                                                                                                       | <b>Cultural aspects of recreation</b>                                                | Specific cultural beliefs regarding RW                                                                                                                                                |                                           |                                                                                                                                                     |
| <b>Natural environment</b>                          |                                                                                                                                                                       |                                                                                      |                                                                                                                                                                                       |                                           |                                                                                                                                                     |
| <b>Weather</b>                                      | Weather conditions that affect RW                                                                                                                                     |                                                                                      |                                                                                                                                                                                       |                                           |                                                                                                                                                     |
| <b>Air quality</b>                                  | Air quality or pollution                                                                                                                                              |                                                                                      |                                                                                                                                                                                       |                                           |                                                                                                                                                     |
| <b>Geographic characteristics</b>                   | Topographic or specific geographic characteristics of the environment                                                                                                 |                                                                                      |                                                                                                                                                                                       |                                           |                                                                                                                                                     |
