# Supplementary material for: The role of the perceived environment for recreational walking among adults in socioeconomically disadvantaged situations: A study using walk-along interviews
Source: PubMed Central journal article supplement — SSM Popul Health. 2023 Jul 8;23:101456. doi: 10.1016/j.ssmph.2023.101456 (PMC10368917; doi:10.1016/j.ssmph.2023.101456), 2023-07-08
Supplement: mmc2.pdf [file mmc2.pdf]

**Additional table: Individual participant characteristics**

| <b>Interview</b> | <b>Age</b> | <b>Sex</b> | <b>Nationality</b> |
|------------------|------------|------------|--------------------|
| <b>1</b>         | 49         | Woman      | Belgian            |
| <b>2 + FG1</b>   | 29         | Woman      | Belgian            |
| <b>3 + FG2</b>   | 65         | Man        | Belgian            |
| <b>4 + FG2</b>   | 60         | Woman      | Belgian            |
| <b>5 + FG2</b>   | 59         | Man        | Belgian            |
| <b>6 + FG1</b>   | 41         | Woman      | Belgian            |
| <b>7</b>         | 47         | Woman      | Non-Belgian        |
| <b>8 + FG1</b>   | 45         | Man        | Non-Belgian        |
| <b>9</b>         | 51         | Man        | Belgian            |
| <b>10</b>        | 31         | Woman      | Belgian            |
| <b>11</b>        | 42         | Woman      | Belgian            |
| <b>12 + FG2</b>  | 61         | Man        | Belgian            |
| <b>13</b>        | 33         | Woman      | Belgian            |
| <b>14 + FG2</b>  | 56         | Man        | Belgian            |
| <b>15 + FG2</b>  | 62         | Woman      | Belgian            |
| <b>16 + FG1</b>  | 30         | Woman      | Belgian            |
| <b>17</b>        | 29         | Man        | Belgian            |
| <b>18 + FG1</b>  | 54         | Woman      | Belgian            |
| <b>19 + FG1</b>  | 57         | Woman      | Belgian            |
| <b>20 + FG2</b>  | 64         | Woman      | Belgian            |
| <b>21</b>        | 51         | Man        | Belgian            |
| <b>22 + FG3</b>  | 41         | Man        | Belgian            |
| <b>23 + FG3</b>  | 52         | Man        | Belgian            |
| <b>24</b>        | 65         | Man        | Non-Belgian        |
| <b>25 + FG3</b>  | 33         | Woman      | Belgian            |
| <b>26 + FG3</b>  | 45         | Man        | Belgian            |
| <b>27 + FG3</b>  | 58         | Woman      | Belgian            |
| <b>28</b>        | 41         | Man        | Belgian            |
| <b>29 + FG4</b>  | 55         | Man        | Belgian            |
| <b>30</b>        | 55         | Woman      | Belgian            |
| <b>31 + FG3</b>  | 62         | Woman      | Belgian            |
| <b>32 + FG4</b>  | 43         | Woman      | Non-Belgian        |
| <b>33</b>        | 56         | Man        | Belgian            |
| <b>34</b>        | 38         | Woman      | Belgian            |
| <b>35</b>        | 40         | Woman      | Belgian            |
| <b>36 + FG4</b>  | 60         | Man        | Belgian            |
| <b>37</b>        | 44         | Woman      | Belgian            |
| <b>38</b>        | 25         | Woman      | Non-Belgian        |
