# Supplementary material for: The role of the perceived environment for recreational walking among adults in socioeconomically disadvantaged situations: A study using walk-along interviews
Source: PubMed Central journal article supplement — SSM Popul Health. 2023 Jul 8;23:101456. doi: 10.1016/j.ssmph.2023.101456 (PMC10368917; doi:10.1016/j.ssmph.2023.101456), 2023-07-08
Supplement: mmc3.pdf [file mmc3.pdf]

## COREQ (COnsolidated criteria for REporting Qualitative research) Checklist

A checklist of items that should be included in reports of qualitative research. You must report the page number in your manuscript where you consider each of the items listed in this checklist. If you have not included this information, either revise your manuscript accordingly before submitting or note N/A.

| Topic                                          | Item number | Guide Questions/Description                                                                                                                              | Reported on page                             |
|------------------------------------------------|-------------|----------------------------------------------------------------------------------------------------------------------------------------------------------|----------------------------------------------|
| <b>Domain 1: Research team and reflexivity</b> |             |                                                                                                                                                          |                                              |
| <i>Personal characteristics</i>                |             |                                                                                                                                                          |                                              |
| Interviewer/facilitator                        | 1           | Which author/s conducted the interview or focus group?                                                                                                   | p.7 (SD) + author contributions              |
| Credentials                                    | 2           | What were the researcher's credentials? E.g. PhD, MD                                                                                                     | Title page                                   |
| Occupation                                     | 3           | What was their occupation at the time of the study?                                                                                                      | /                                            |
| Gender                                         | 4           | Was the researcher male or female?                                                                                                                       | p.7 (female) + author contributions          |
| Experience and training                        | 5           | What experience or training did the researcher have?                                                                                                     | Author contributions                         |
| <i>Relationship with participants</i>          |             |                                                                                                                                                          |                                              |
| Relationship established                       | 6           | Was a relationship established prior to study commencement?                                                                                              | Author contributions                         |
| Participant knowledge of the interviewer       | 7           | What did the participants know about the researcher? e.g. personal goals, reasons for doing the research                                                 | p.7                                          |
| Interviewer characteristics                    | 8           | What characteristics were reported about the interviewer/facilitator? e.g. Bias, assumptions, reasons and interests in the research topic                | /                                            |
| <b>Domain 2: Study design</b>                  |             |                                                                                                                                                          |                                              |
| <i>Theoretical framework</i>                   |             |                                                                                                                                                          |                                              |
| Methodological orientation and Theory          | 9           | What methodological orientation was stated to underpin the study? e.g. grounded theory, discourse analysis, ethnography, phenomenology, content analysis | p.8                                          |
| <i>Participant selection</i>                   |             |                                                                                                                                                          |                                              |
| Sampling                                       | 10          | How were participants selected? e.g. purposive, convenience, consecutive, snowball                                                                       | p.6                                          |
| Method of approach                             | 11          | How were participants approached? e.g. face-to-face, telephone, mail, email                                                                              | p.6                                          |
| Sample size                                    | 12          | How many participants were in the study?                                                                                                                 | p.7-8                                        |
| Non-participation                              | 13          | How many people refused to participate or dropped out? Reasons?                                                                                          | p.7-8                                        |
| <i>Setting</i>                                 |             |                                                                                                                                                          |                                              |
| Setting of data collection                     | 14          | Where was the data collected? e.g. home, clinic, workplace                                                                                               | p.7-8                                        |
| Presence of non-participants                   | 15          | Was anyone else present besides the participants and researchers?                                                                                        | p.7-8                                        |
| Description of sample                          | 16          | What are the important characteristics of the sample? e.g. demographic data, date                                                                        | p.8-9 + Supplementary file 2                 |
| <i>Data collection</i>                         |             |                                                                                                                                                          |                                              |
| Interview guide                                | 17          | Were questions, prompts, guides provided by the authors? Was it pilot tested                                                                             | p.7                                          |
| Repeat interviews                              | 18          | Were repeat interviews carried out? If yes, how many?                                                                                                    | p.7                                          |
| Audio/visual recording                         | 19          | Did the research use audio or visual recording to collect the data?                                                                                      | p.7                                          |
| Field notes                                    | 20          | Were field notes made during and/or after the interview or focus group?                                                                                  | N/A                                          |
| Duration                                       | 21          | What was the duration of the interviews or focus group?                                                                                                  | p.7                                          |
| Data saturation                                | 22          | Was data saturation discussed?                                                                                                                           | p.7-8                                        |
| Transcripts returned                           | 23          | Were transcripts returned to participants for comment and/or correction                                                                                  | p.7-8 (member check in form of focus groups) |

| Topic                                  | Item number | Guide Questions/Description                                                                                                        | Reported on page                                |
|----------------------------------------|-------------|------------------------------------------------------------------------------------------------------------------------------------|-------------------------------------------------|
| <b>Domain 3: analysis and findings</b> |             |                                                                                                                                    |                                                 |
| <i>Data analysis</i>                   |             |                                                                                                                                    |                                                 |
| Number of data coders                  | 24          | How many data coders coded the data?                                                                                               | p.8                                             |
| Description of the coding tree         | 25          | Did authors provide a description of the coding tree?                                                                              | Supplementary file 1                            |
| Derivation of themes                   | 26          | Were themes identified in advance or derived from the data?                                                                        | p.8                                             |
| Software                               | 27          | What software, if applicable, was used to manage the data?                                                                         | p.8                                             |
| Participant checking                   | 28          | Did participants provide feedback on the findings?                                                                                 | p.7-8<br>(member check in form of focus groups) |
| <i>Reporting</i>                       |             |                                                                                                                                    |                                                 |
| Quotations presented                   | 29          | Were participant quotations presented to illustrate the themes/findings?<br>Was each quotation identified? e.g. participant number | p.8-16<br>(sex+age)                             |
| Data and findings consistent           | 30          | Was there consistency between the data presented and the findings?                                                                 | p.8-16                                          |
| Clarity of major themes                | 31          | Were major themes clearly presented in the findings?                                                                               | p.8-16                                          |
| Clarity of minor themes                | 32          | Is there a description of diverse cases or discussion of minor themes?                                                             | p.8-16                                          |

Developed from: Tong A, Sainsbury P, Craig J. Consolidated criteria for reporting qualitative research (COREQ): a 32-item checklist for interviews and focus groups. *International Journal for Quality in Health Care*. 2007. Volume 19, Number 6: pp. 349 – 357
